# Supplementary material
Source: publisher figshare collection journal article supplement (https://karger.figshare.com/ndownloader/files/26062598)
Supplement: Supplementary file 1 [file 26062598]

**Supplementary appendix**

Table S1. PubMed search strategy

| Search Terms |
| --- |
| 1. "pneumonia"[Mesh] OR pneumonia[tiab] OR “community-acquired pneumonia” [tiab] OR “CAP” [tiab] |
| 2. "pulmonary disease, chronic obstructive"[Mesh] OR "COPD"[tiab] OR "chronic obstructive pulmonary disease"[tiab] |
| 3. 1 AND 2 |
